# Supplementary material for: Circulating Tumor Cell Kinetics and Morphology from the Liquid Biopsy Predict Disease Progression in Patients with Metastatic Colorectal Cancer Following Resection
Source: MDPI journal article supplement (doi:10.3390/cancers14030642), 2022-01-27
Supplement: s1 [file s1]

# Supplementary Materials:

**Table S1.** Patient positivity for each CTC subtype at various time-points throughout a patient's treatment. Time-points of blood draws are listed in reference to the day of the tumor resection. Patient positivity is defined as  $\geq 1$  CTC subtype/mL and is reported as the number of positive samples over the number of total samples at a given time-point.

| Classification | Pre-Surgery | Pre-Resection | Post-Resection | 2 Day | 1–2 Week | 1 Month | 2–3 Month | 6 Month | 1 Year | 2 Year |
|----------------|-------------|---------------|----------------|-------|----------|---------|-----------|---------|--------|--------|
| HD-CTC         | 7/10        | 30/45         | 32/41          | 8/12  | 18/27    | 4/6     | 5/6       | 8/10    | 2/2    | 2/2    |
| CTCC           | 5/10        | 17/45         | 10/41          | 5/12  | 5/27     | 1/6     | 1/6       | 1/10    | 0/2    | 1/2    |
| CTC-Small      | 9/10        | 36/45         | 28/41          | 8/12  | 20/27    | 4/6     | 5/6       | 7/10    | 1/2    | 1/2    |
| CTC-Apoptotic  | 8/10        | 34/45         | 29/41          | 9/12  | 20/27    | 5/6     | 2/6       | 5/10    | 0/2    | 1/2    |
| CTC-NoCK       | 9/10        | 36/45         | 35/41          | 9/12  | 26/27    | 5/6     | 3/6       | 9/10    | 2/2    | 2/2    |

**Table S2.** Survival statistics for clinical and HDSCA data elements. CI: Confidence Intervals for listed HRs.

| Variable                          | Survival | <i>p</i> Value | HR    | CI          |
|-----------------------------------|----------|----------------|-------|-------------|
| Number of metastases              | OS       | 0.0037         | 1.14  | 1.044–1.249 |
| Number of metastases              | PFS      | 0.0461         | 1.11  | 1.002–1.235 |
| CTC-NoCK at 2 day                 | OS       | 0.0213         | 1.05  | 1.007–1.086 |
| CTC-Apoptotic at 2 day            | PFS      | 0.0411         | 1.03  | 1.001–1.059 |
| HD-CTC at 1 month                 | PFS      | 0.0468         | 1.03  | 1.000–1.065 |
| CKtotal at 1 month                | OS       | 0.0492         | 1.02  | 1.000–1.046 |
| CKtotal at 6 months               | PFS      | 0.0878         | 0.9   | 0.806–1.015 |
| HD-CTC at 6 months                | PFS      | 0.0817         | 0.82  | 0.657–1.025 |
| HD-CTC pre-res to post-res        | OS       | 0.8468         | 0.997 | 0.997–1.002 |
| CCTC pre-res to post-res          | OS       | 0.3120         | 0.96  | 0.895–1.036 |
| CTC-Apoptotic pre-res to post-res | PFS      | 0.0024         | 1.01  | 1.005–1.023 |
| NoCK-CTC pre-res to 2 day         | OS       | 0.0388         | 1.04  | 1.002–1.075 |
| CCTC pre-res to 1–2 week          | OS       | 0.0478         | 0.94  | 0.893–0.999 |
